# Supplementary material for: Characteristics and advantages of adeno-associated virus vector-mediated gene therapy for neurodegenerative diseases
Source: PubMed Central journal article supplement — Neural Regen Res. 2019 Jun;14(6):931–8. doi: 10.4103/1673-5374.250570 (PMC6404499; doi:10.4103/1673-5374.250570), 2019-06
Supplement: NRR-14-931_Suppl2.pdf [file NRR-14-931_Suppl2.pdf]

## OPEN PEER REVIEW REPORT 2

**Name of journal:** Neural Regeneration Research

**Manuscript NO:** NRR-D-18-00713

**Title:** The progress of adeno-associated virus on neurodegenerative diseases in central nervous system

**Reviewer's Name:** Marvin Soriano-Ursua

**Reviewer's country:** Mexico

**Date sent for review:** 2018-10-24

**Date reviewed:** 2018-10-31

**Review time:** 7 days

### COMMENTS TO AUTHORS

This is a concise and complete review.

I suggest you to add some comments about similar and related reports done before:

- Current viral-mediated gene transfer research for treatment of Alzheimer's disease. Sasmita AO. *Biotechnol Genet Eng Rev.* 2018 Oct 14;1-20. doi: 10.1080/02648725.2018.1523521.
- Neuroprotection by immunomodulatory agents in animal models of Parkinson's disease. Martinez B, Peplow PV. *Neural Regen Res.* 2018 Sep;13(9):1493-1506. doi: 10.4103/1673-5374.237108.
- Recent progress and considerations for AAV gene therapies targeting the central nervous system. Lykken EA, Shyng C, Edwards RJ, Rozenberg A, Gray SJ. *J Neurodev Disord.* 2018 May 18;10(1):16. doi: 10.1186/s11689-018-9234-0.
- Emerging Issues in AAV-Mediated In Vivo Gene Therapy. Colella P, Ronzitti G, Mingozi F. *Mol Ther Methods Clin Dev.* 2017 Dec 1;8:87-104. doi: 10.1016/j.omtm.2017.11.007.
- Present and future of adeno associated virus based gene therapy approaches. Ortolano S, Spuch C, Navarro C. *Recent Pat Endocr Metab Immune Drug Discov.* 2012 Jan;6(1):47-66.
- Biology of adeno-associated viral vectors in the central nervous system. Murlidharan G, Samulski RJ, Asokan A. *Front Mol Neurosci.* 2014 Sep 19;7:76. doi: 10.3389/fnmol.2014.00076.
